# Supplementary material
Source: publisher figshare collection journal article supplement (https://acs.figshare.com/ndownloader/files/4550053)

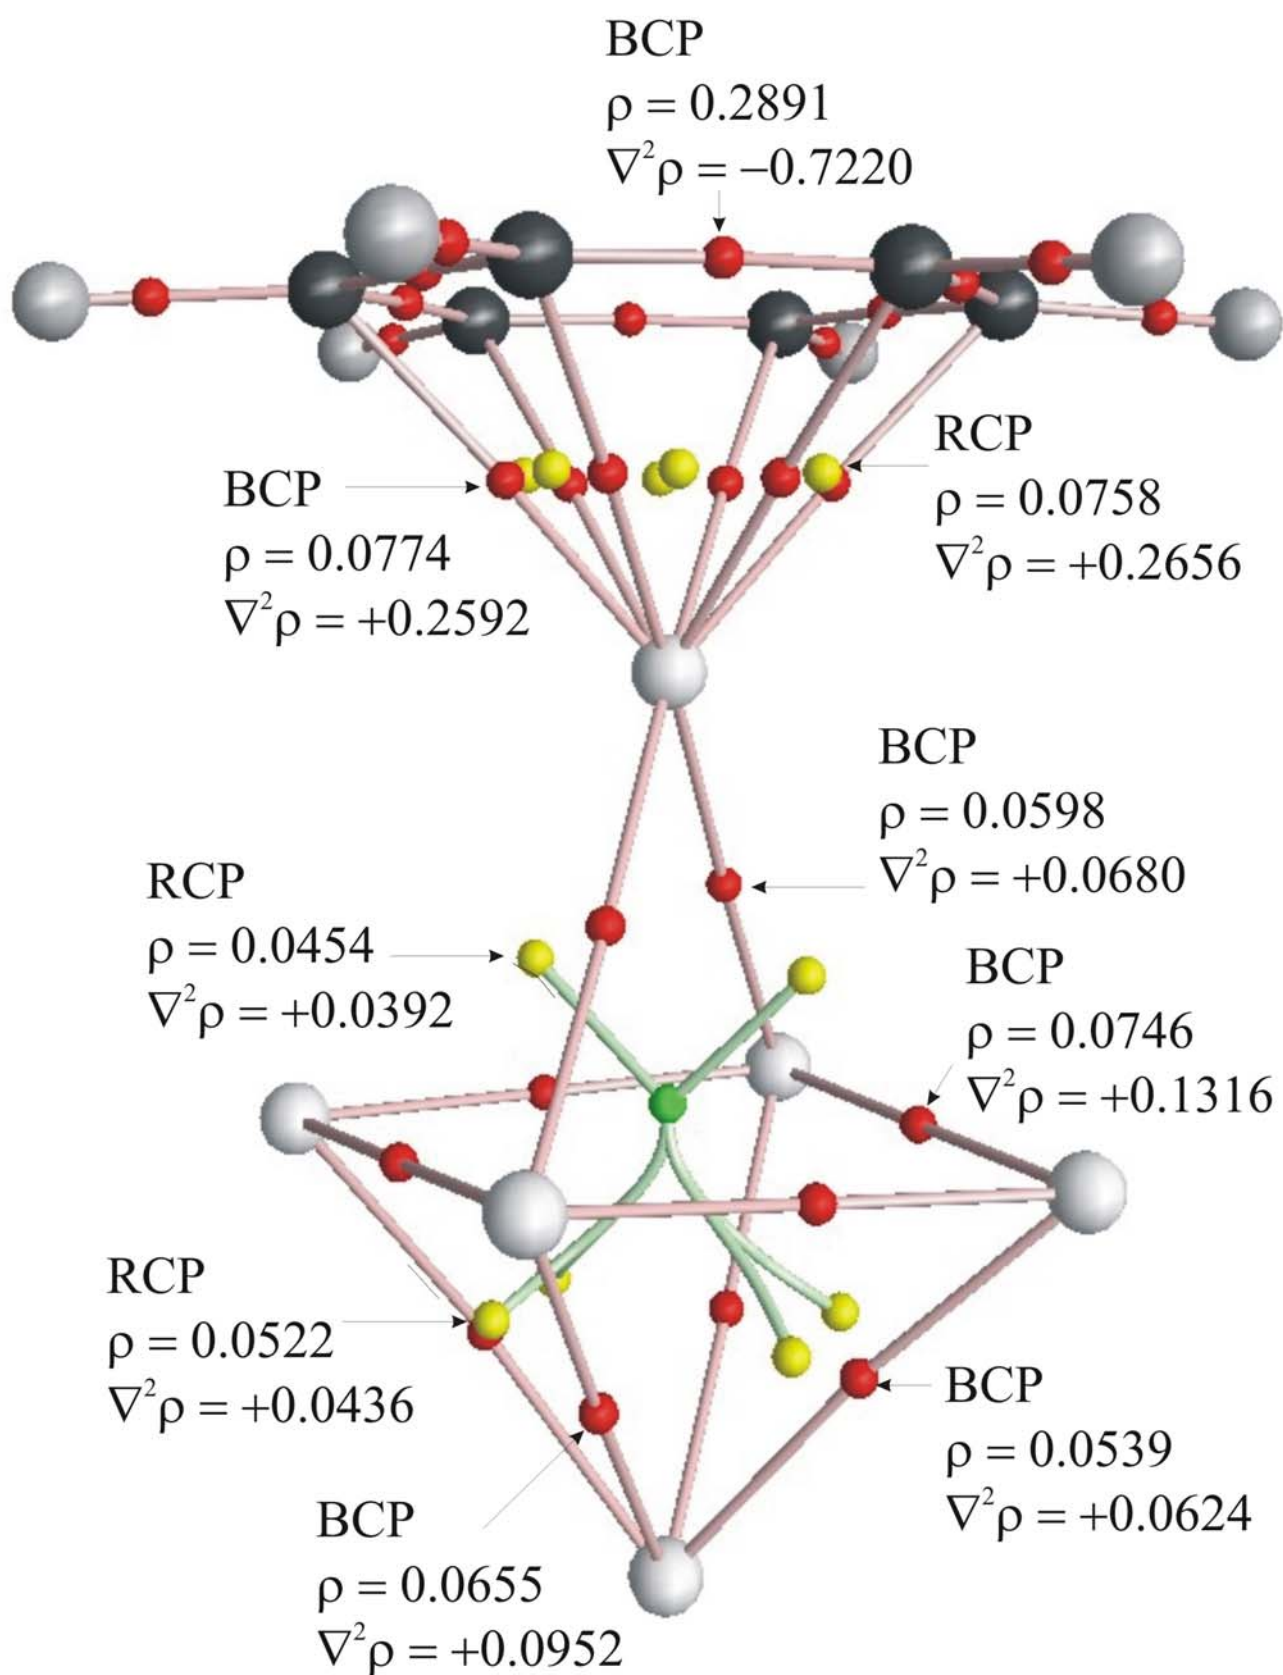

Figure 4 Supporting Information

Supplement: Supplementary file 1 [file 4550053]
